# Supplementary material for: Poly(lactic acid)/poly(ethylene glycol) stereocomplexed physical hydrogels showing thermally-induced gel–sol–gel multiple phase transitions
Source: Royal Society of Chemistry journal article supplement (doi:10.1039/c7qm00502d), 2017-12-12
Supplement: c7qm00502d1.pdf [file c7qm00502d1.pdf]

**Electronic Supplementary Information**

**Poly(lactic acid)/poly(ethylene glycol) stereocomplexed  
physical hydrogels showing thermally-induced gel-sol-gel  
multiple phase transitions**

Hailiang Mao,<sup>a</sup> Chen Wang,<sup>\*b</sup> Xiaohua Chang,<sup>a</sup> Heqing Cao,<sup>a</sup> Guorong Shan,<sup>a</sup>

Yongzhong Bao,<sup>a</sup> Pengju Pan<sup>\*a</sup>

*<sup>a</sup>State Key Laboratory of Chemical Engineering, College of Chemical and Biological  
Engineering, Zhejiang University, 38 Zheda Road, Hangzhou 310027, China*

*<sup>b</sup>Key Laboratory of Auxiliary Chemistry & Technology for Chemical Industry,  
Ministry of Education, Shaanxi University of Science & Technology, Xi'an 710021,  
China*

*\*To whom corresponding should be addressed. Email: wangchenhg@sust.edu.cn (C.  
W.); panpengju@zju.edu.cn (P. P.)*

## Measurements

**Gel Permeation Chromatography (GPC).** Molecular weights were measured by GPC (Waters Co., Milford, MA, USA) at 30 °C. The instrument was equipped with a Waters 2414 refractive index detector and three Waters Styragel columns (Styragel HR2, HR3 and HR4). THF was used as the mobile phase with a flow rate of 1.0 mL/min. Molecular weight was calibrated by using polystyrene as the standard.

**Dynamic Light Scattering (DLS).** Hydrodynamic diameter ( $D_h$ ) of copolymers and copolymer mixture in dilute solution was measured by DLS (Zetasizer Nano ZS90, Malvern Co.). The micellar solutions (0.02 wt%) of PEG–PDLA and PLLA–PEG–PLLA were separately prepared by solvent exchange method.<sup>1</sup> The micellar solutions were filtered through a 0.45 µm membrane before the measurement at 20 °C.

## Reference

[1] Ma, C.; Pan, P.; Shan, G.; Bao, Y.; Fujita, M.; Maeda, M. Core–Shell Structure, Biodegradation, and Drug Release Behavior of Poly(lactic acid)/Poly(ethylene glycol) Block Copolymer Micelles Tuned by Macromolecular Stereostructure. *Langmuir* **2015**, *31*, 1527–1536.

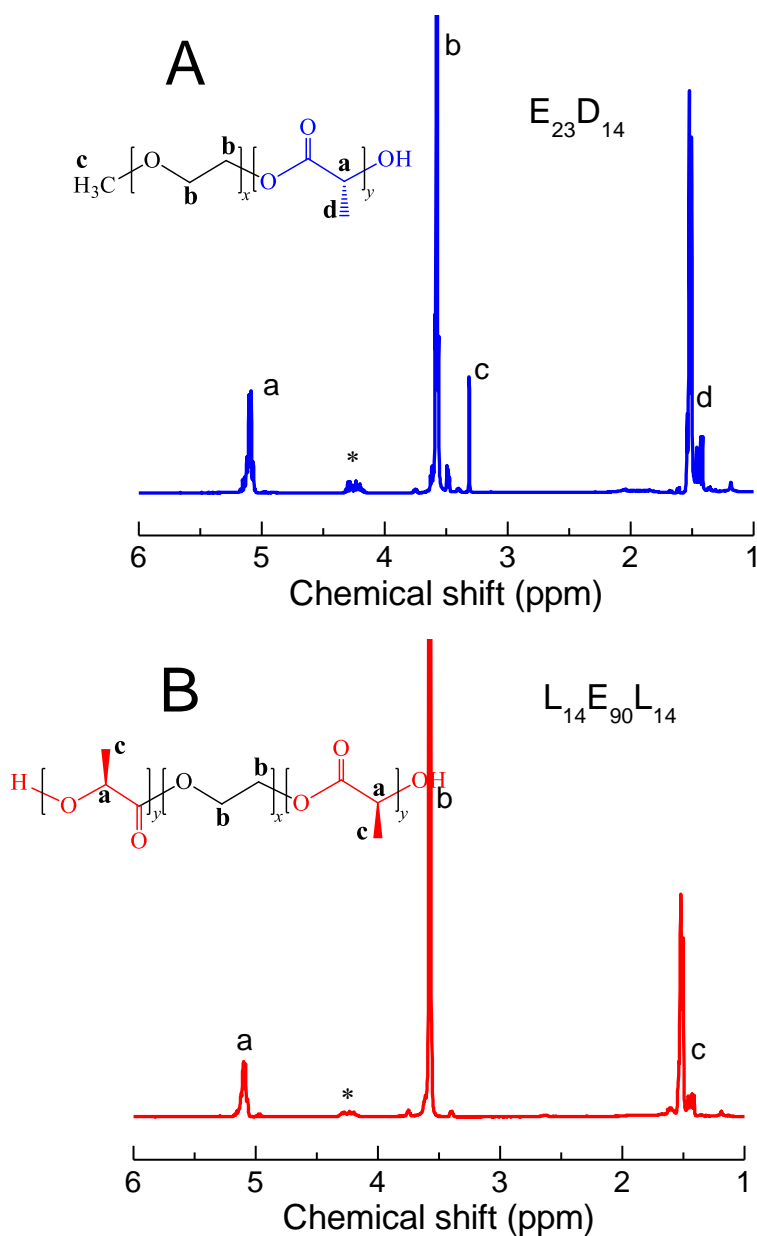

**Fig. S1** Representative  $^1\text{H}$  NMR spectra of PEG-PDLA diblock and PLLA-PEG-PLLA triblock copolymers: (A) PEG-PDLA; (B) PLLA-PEG-PLLA. The peak at 4.3 ppm (indicated by asterisk) is assigned to the terminal methine proton of PLLA/PDLA blocks and the terminal methylene protons of PEG block that is connected to PLA.

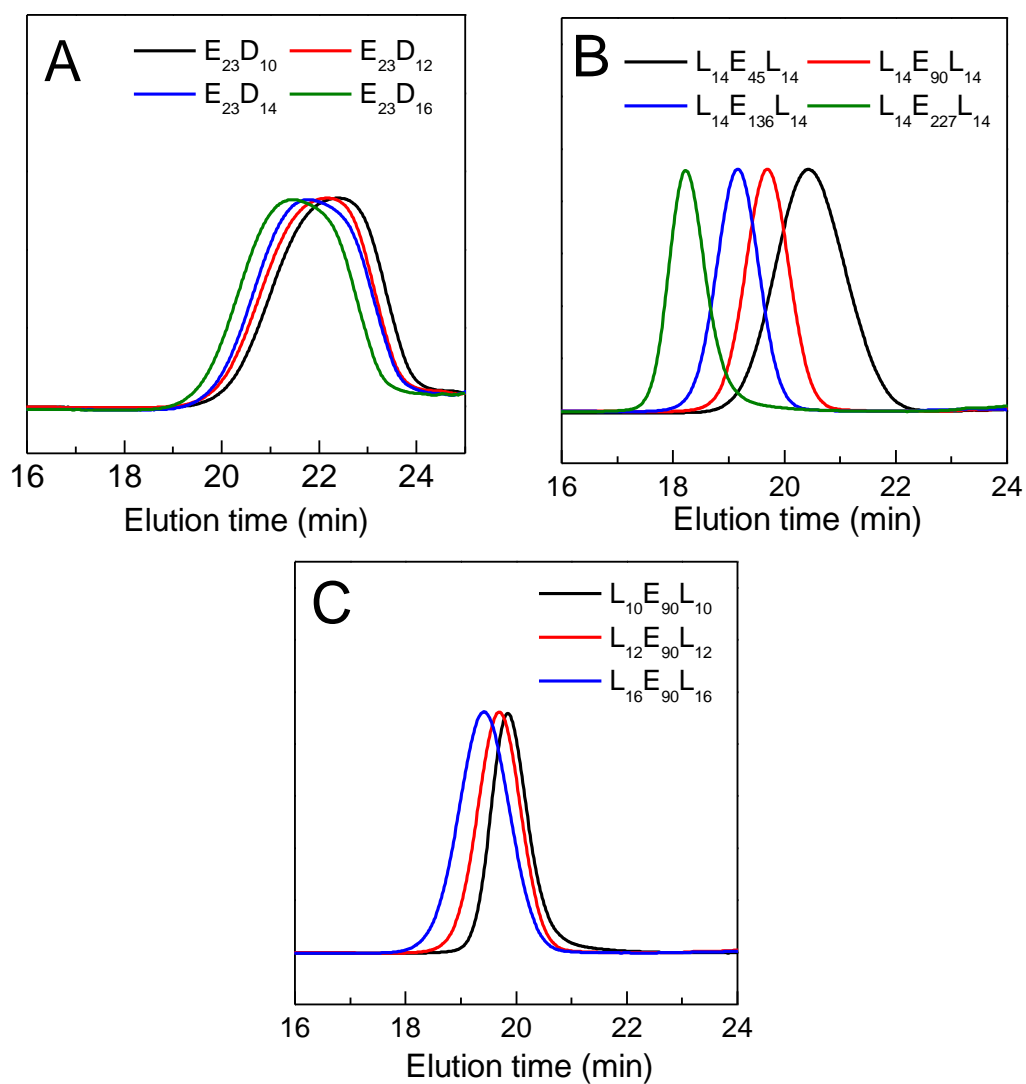

**Fig. S2** GPC traces of PEG-PDLA diblock and PLLA-PEG-PLLA triblock copolymers: (A) PEG-PDLA diblock copolymers with different PDLA block lengths; (B) PLLA-PEG-PLLA triblock copolymer with different PEG block lengths; (C) PLLA-PEG-PLLA triblock copolymer with different PLLA block lengths.

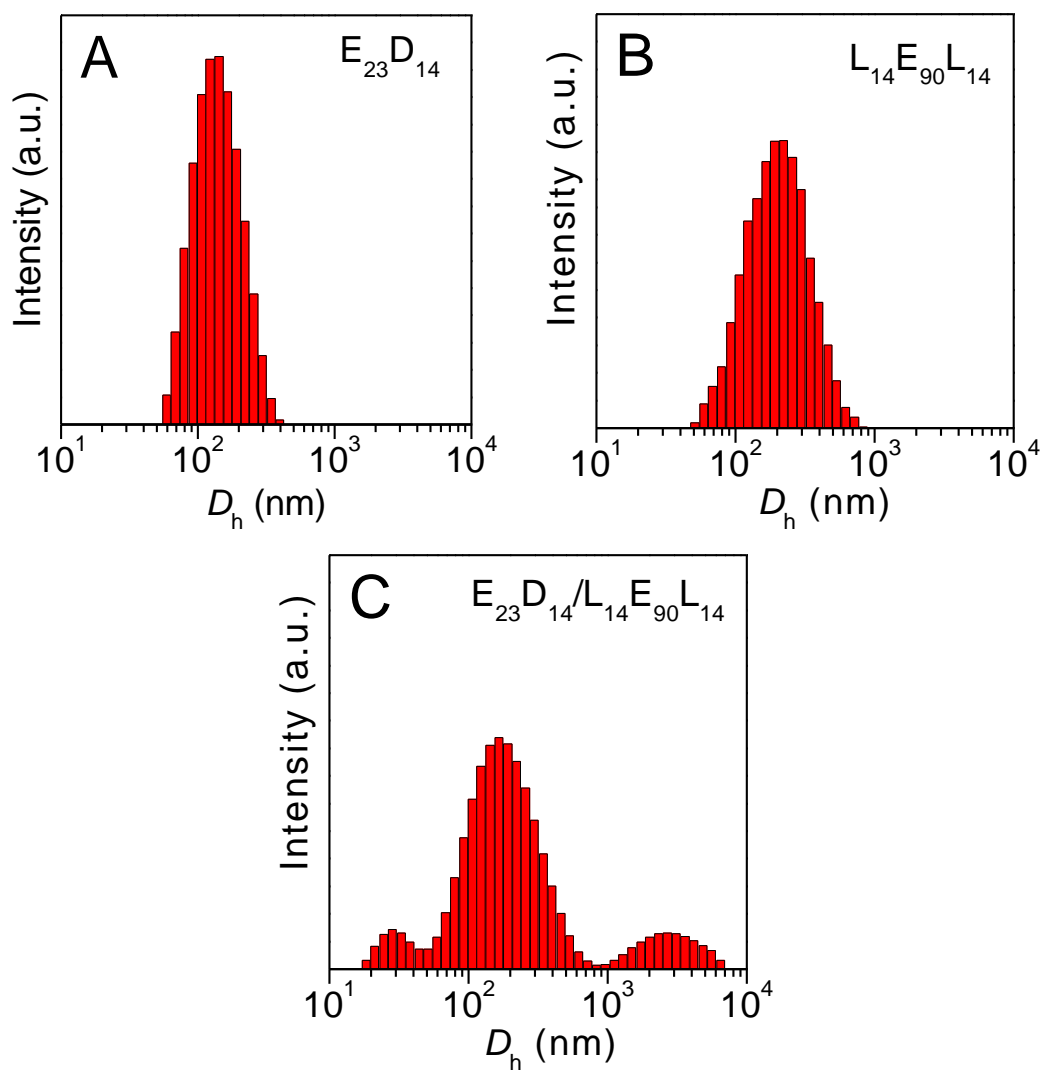

**Fig. S3** Hydrodynamic diameter ( $D_h$ ) and its distribution for PEG-PDLA, PLLA-PEG-PLLA, and PEG-PDLA/PLLA-PEG-PLLA enantiomeric mixture in water solution (0.02 wt%) at 20 °C: (A)  $E_{23}D_{14}$ , (B)  $L_{14}E_{90}L_{14}$ , (C)  $E_{23}D_{14}/L_{14}E_{90}L_{14}$  5/5 mixture.

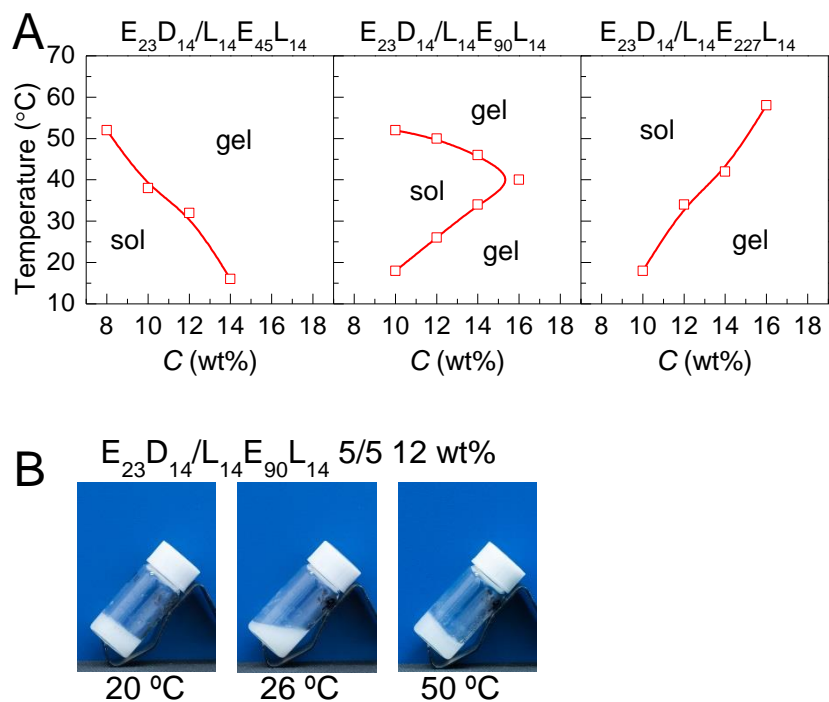

**Fig. S4** (A) Phase diagrams of premixed PEG-PDLA/PLLA-PEG-PLLA 5/5 mixtures with the different concentrations in water. (B) Digital photographs of  $E_{23}D_{14}/L_{14}E_{90}L_{14}$  5/5 mixture (12 wt%) at different temperatures. In the premixing procedure, PEG-PDLA and PLLA-PEG-PLLA copolymers were mixed and dissolved in water together.
